# Hsa\_circ\_0018818 knockdown suppresses tumorigenesis in non-small cell lung cancer by sponging miR-767-3p

Xiaohui Xu<sup>1,2</sup>, Xiaoyun Zhou<sup>1,2</sup>, Chao Gao<sup>1,2</sup>, Yushang Cui<sup>1,2</sup>

<sup>1</sup>Department of Thoracic Surgery, Peking Union Medical College Hospital, Beijing 100730, China

<sup>2</sup>Peking Union Medical College, Chinese Academy of Medical Sciences, Beijing 100730, China

**Correspondence to:** Yushang Cui; email: [yushangcui@126.com](mailto:yushangcui@126.com)

**Keywords:** hsa\_circ\_0018818, NSCLC, miR-767-3p, NID1

**Received:** December 20, 2019

**Accepted:** March 9, 2020

**Published:** May 1, 2020

**Copyright:** Xu et al. This is an open-access article distributed under the terms of the Creative Commons Attribution License (CC BY 3.0), which permits unrestricted use, distribution, and reproduction in any medium, provided the original author and source are credited.

## ABSTRACT

To identify potential therapeutic targets in non-small cell lung cancer NSCLC, we conducted a bioinformatics analysis of circRNAs differentially expressed between NSCLC tissues and adjacent normal tissues. Cell proliferation and apoptosis was assessed using CCK-8 and flow cytometry, respectively. A connection between hsa\_circ\_0018818 and miR-767-3p was confirmed in dual luciferase reporter assays. Gene and protein expression in NSCLC cells were measured using quantitative PCR and Western-blotting, respectively. And a xenograft tumor model was established to assess the function of hsa\_circ\_0018818 in NSCLC *in vivo*. Hsa\_circ\_0018818 was greatly upregulated in NSCLC tumor tissues. Knocking down hsa\_circ\_0018818 using a targeted shRNA inhibited the proliferation and invasiveness of NSCLC cells and induced their apoptosis via the miR-767-3p/Nidogen 1 (NID1) signaling axis. Hsa\_circ\_0018818 knockdown also inactivated Epithelial-mesenchymal transition (EMT) process and PI3K/Akt signaling. In summary, hsa\_circ\_0018818 knockdown inhibited NSCLC tumorigenesis *in vitro* and *in vivo*, which suggests it could potentially serve as a target for the treatment of NSCLC.

## INTRODUCTION

Lung cancers are the most commonly diagnosed malignant tumors and a major cause of cancer-related death throughout the world [1]. Among those, non-small cell lung cancers (NSCLC) make up approximately 83% of all lung cancers. Moreover, about 80% of patients with NSCLC are diagnosed at advanced stages [2]. Although much effort has been made to improve treatment of NSCLC, the prognosis remains poor [3]. It is therefore urgent to find a new biomarker for diagnosis of NSCLC at earlier stages, which could potentially improve prognoses and outcomes among patients with NSCLC.

Circular RNA (circRNA) is an endogenous RNA with a covalently closed cyclic structure [4]. Intracellular circRNAs with competing endogenous RNA (ceRNA) activity may function as microRNA (miRNA)

antagonists by binding to microRNA recognition elements (MREs) on target genes. This would suppress the activity of miRNA, thereby enhancing expression of target genes [5, 6]. For that reason, circRNAs are considered important biological regulators when exploring the molecular mechanisms of diseases or seeking to identify therapeutic markers. For example, recent studies have shown the importance of circRNAs in modulating cancer-related signaling pathways [7, 8]. In addition, particular circRNAs may be related to specific types of malignant tumors and serve as key factors for tumorigenesis [9–11]. However, the function of circRNAs during the progression of NSCLC remains largely unexplored. Therefore, in an effort to identify potential targets for the development of novel therapeutic strategies against NSCLC, we used systemic bioinformatics analysis to identify circRNAs essential for the biological processes of NSCLC.

## RESULTS

### Differentially expressed circRNAs in NSCLC

To detect differentially expressed circRNAs in NSCLC, we performed a bioinformatics analysis. In Figure 1A–1C, circRNAs differentially expressed as compared to normal tissues in the GSE101586, GSE101586 and GSE112214 datasets are presented as volcano plots. Overlap among the three datasets is illustrated by the Venn diagram in

Figure 1D. Among the differentially expressed circRNAs, 890 in GSE101684 were related to early stage NSCLC.

Gene ontology (Go) and pathway analyses performed to determine the host genes of the circRNAs showed that the most common biological process was nucleocytoplasmic transport. The most enriched cellular component was cell-cell junction, and the most enriched molecular function was GTPase binding (Figure 2A). Pathway analysis revealed that the phosphatidylinositol

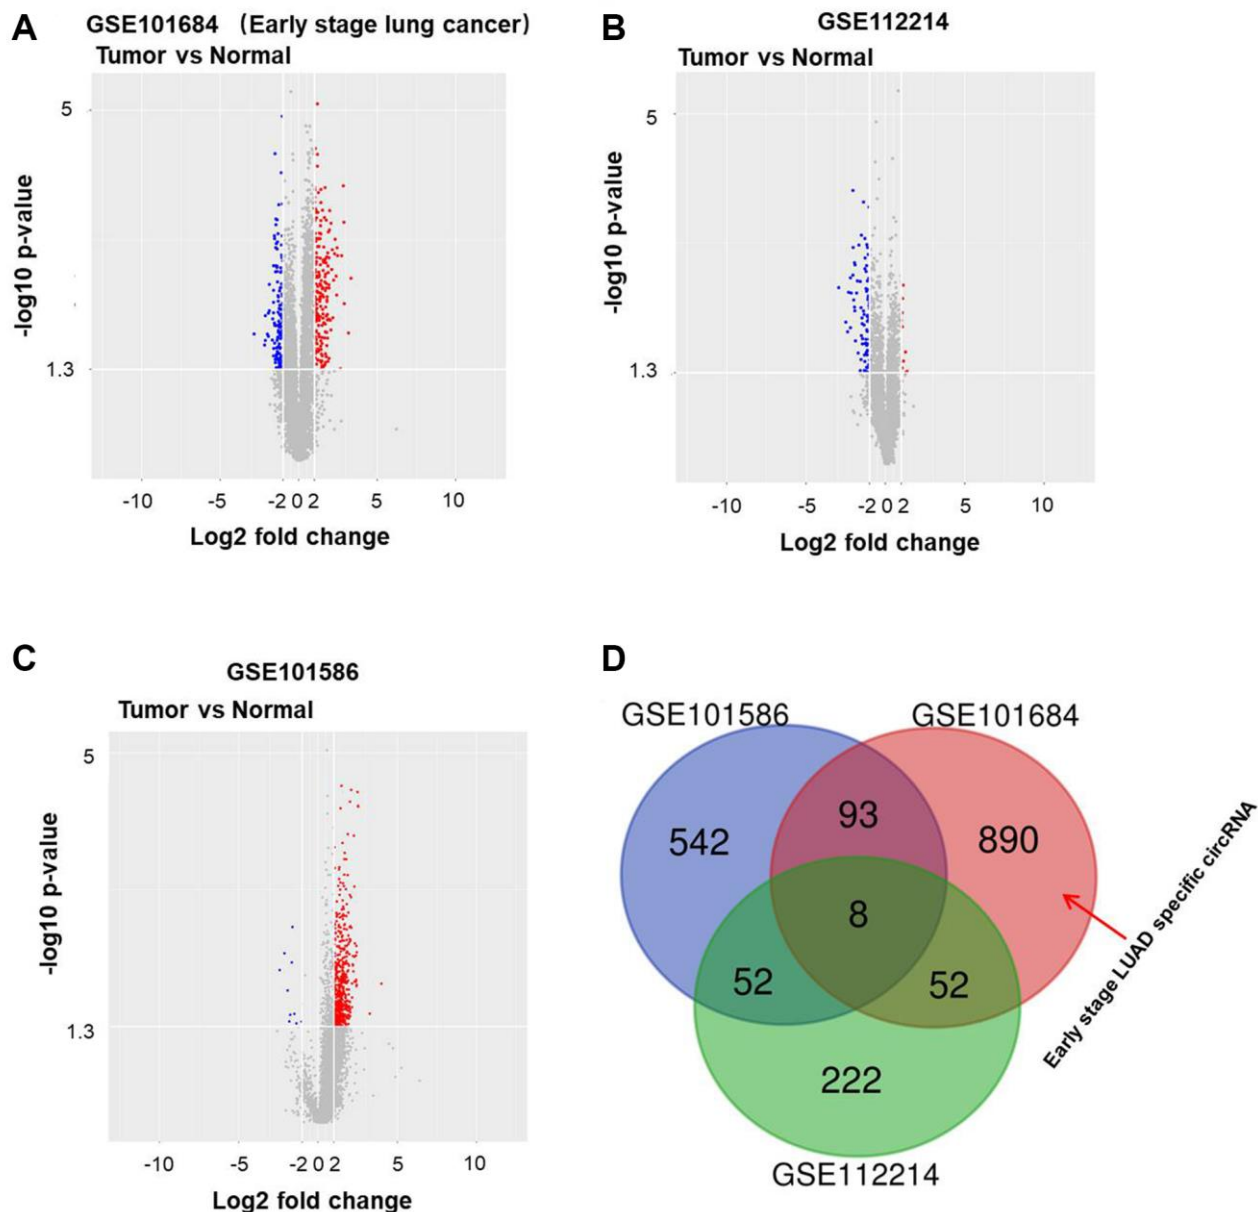

**Figure 1. Differentially expressed circRNAs in NSCLC.** Volcano plots illustrating the circRNAs differentially expressed in NSCLC detected in the (A) GSE101684, (B) GSE112214 and (C) GSE101586 datasets. Red indicates a higher expression level, while blue indicates a lower expression level. (D) Venn diagram showing the overlap among the differentially expressed circRNAs in the three datasets. In GSE101684, 890 circRNAs were related to NSCLC.

3 kinase (PI3K) signaling pathway was related to the development of NSCLC (Figure 2B).

### Silencing *hsa\_circ\_0018818* significantly inhibits NSCLC cell proliferation

The top differentially expressed circRNAs in GSE101684 were related to early stage NSCLC (Figure 3A). Among them, *hsa\_circ\_0018818* (host gene: *USP54*) closely correlated with NSCLC tumorigenesis. Therefore, *hsa\_circ\_0018818* was selected for further analysis. In addition, *hsa\_circ\_0018818* was significantly upregulated in NSCLC tissues compared with adjacent normal tissues (Figure 3B). Besides, *hsa\_circ\_0018818* was closely associated with the metastasis of NSCLC (Table 1). RT-qPCR analysis showed that *hsa\_circ\_0018818* expression was upregulated in several NSCLC cell lines as compared to BEAS-2B normal lung epithelial cells (Figure 3C). Further analysis of A549 and NCI-H1650 cells showed that transfecting the cells with shRNA1 or shRNA2 targeting *hsa\_circ\_0018818* significantly downregulated its expression (Figure 3D, 3E). Although both shRNAs were stably transfected, *hsa\_circ\_0018818* shRNA1 exhibited better transfection efficiency and was therefore used in subsequent experiments. CCK-8 assays demonstrated that silencing of *hsa\_circ\_000018818* significantly inhibited NSCLC cell proliferation (Figure 3F, 3G).

### *Hsa\_circ\_0018818* shRNA1 induces apoptosis and reduces the invasiveness of NSCLC cells

Flow cytometry exemplified by the results presented in Figure 4A, 4B showed that downregulating *hsa\_circ\_0018818* obviously induced apoptosis among both

A549 and NCI-H1650 cells. Moreover, transwell assays revealed that transfection with *hsa\_circ\_0018818* shRNA1 substantially reduced the invasiveness of these cells (Figure 4C, 4D). Because, NCI-H1650 cells were more sensitive to *hsa\_circ\_0018818* shRNA1 than A549 cells, NCI-H1650 cells were used in the following experiments.

### MiR-767-3p is a downstream target of *hsa\_circ\_0018818*

To investigate the mechanism by which *hsa\_circ\_0018818* regulates the progression of NSCLC, its interactome was examined using the web tool CircInteractome (<https://circinteractome.nia.nih.gov/>). We found that miR-767-3p was the most likely downstream target of *hsa\_circ\_0018818* (Figure 5A, 5B). In addition, RT-qPCR analysis demonstrated that miR-767-3p expression was notably upregulated by miR-767-3p agonist and but downregulated by miR-767-3p antagonist (Figure 5C). Dual luciferase reporter assays confirmed that miR-767-3p is a downstream target of *hsa\_circ\_0018818* (Figure 5D). This was further verified by fluorescence in situ hybridization (FISH), which showed their colocalization with cells (Figure 5E). Taken together, these findings indicate that miR-767-3p is a downstream target of *hsa\_circ\_0018818*.

### Nidogen 1 (NID1) is a direct target of miR-767-3p

To determine the target of miR-767-3p, Targetscan ([http://www.targetscan.org/vert\\_71/](http://www.targetscan.org/vert_71/)), miRDB (<http://www.mirdb.org/>), and dual luciferase assays were used. As illustrated in Figure 5F, 5G, NID1 is a direct target of miR-767-3p.

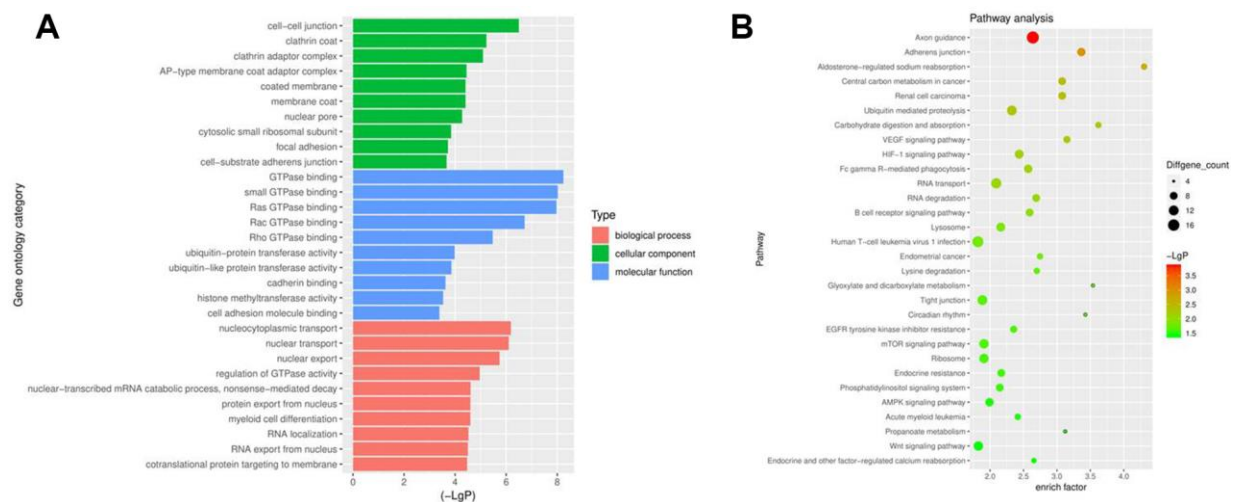

**Figure 2. Profiles of circRNAs in NSCLC analyzed with GO and pathway analyses. (A)** Go analysis exploring the potential functions of differentially expressed circRNAs. **(B)** Pathway analysis exploring the signaling pathways related to NSCLC.

### Hsa\_circ\_0018818 knockdown inhibits NSCLC progression by inactivating PI3K signaling

Subsequent western blot analysis demonstrated that hsa\_circ\_0018818 knockdown significantly decreased expression of NID1 (Figure 6A, 6B). This inhibitory effect of hsa\_circ\_0018818 shRNA1 on NID1 was partially reversed by miR-767-3p antagonist (Figure 6B). Moreover, expression of Twist-2 and E-cadherin in NSCLC cells was notably increased by knockdown of hsa\_circ\_0018818. In contrast, hsa\_circ\_0018818 shRNA1 greatly decreased the expression of Vimentin. Meanwhile, downregulation of miR-136 partially suppressed the inhibitory effect of hsa\_circ\_0018818 shRNA on EMT process of NSCLC (Figure 6A, 6C–6E). Besides, expression of p-Akt and p-ERK in NSCLC cells was significantly downregulated by hsa\_circ\_0018818 knockdown, but was partially rescued in the presence of miR-767-3p antagonist (Figure 6A, 6F, 6G). This suggests that hsa\_circ\_0018818 silencing inhibits the progression of NSCLC by inactivating EMT process and PI3K/Akt signaling.

### Akt inhibitor further enhanced the inhibitory effect of hsa\_circ\_0018818 shRNA on the progression of NSCLC

To further verify the mechanism by which hsa\_circ\_0018818 mediated the progression of NSCLC, CCK-8 assay was performed. The data confirmed that anti-proliferative effect of hsa\_circ\_0018818 shRNA on NSCLC was further increased in the presence of AZD5363 (Figure 7A). Consistently, AZD5363 enhanced the apoptotic effect of hsa\_circ\_0018818 shRNA (Figure 7B). Moreover, the inhibitory effect of hsa\_circ\_0018818 shRNA on cell invasion was enhanced by AZD5363 as well (Figure 7C). To sum up, Akt inhibitor further enhanced the inhibitory effect of hsa\_circ\_0018818 shRNA on progression of NSCLC.

### Hsa\_circ\_0018818 knockdown significantly inhibits NSCLC tumor growth *in vivo*

Finally, a xenograft mouse model was established to detect the function of hsa\_circ\_0018818 in NSCLC

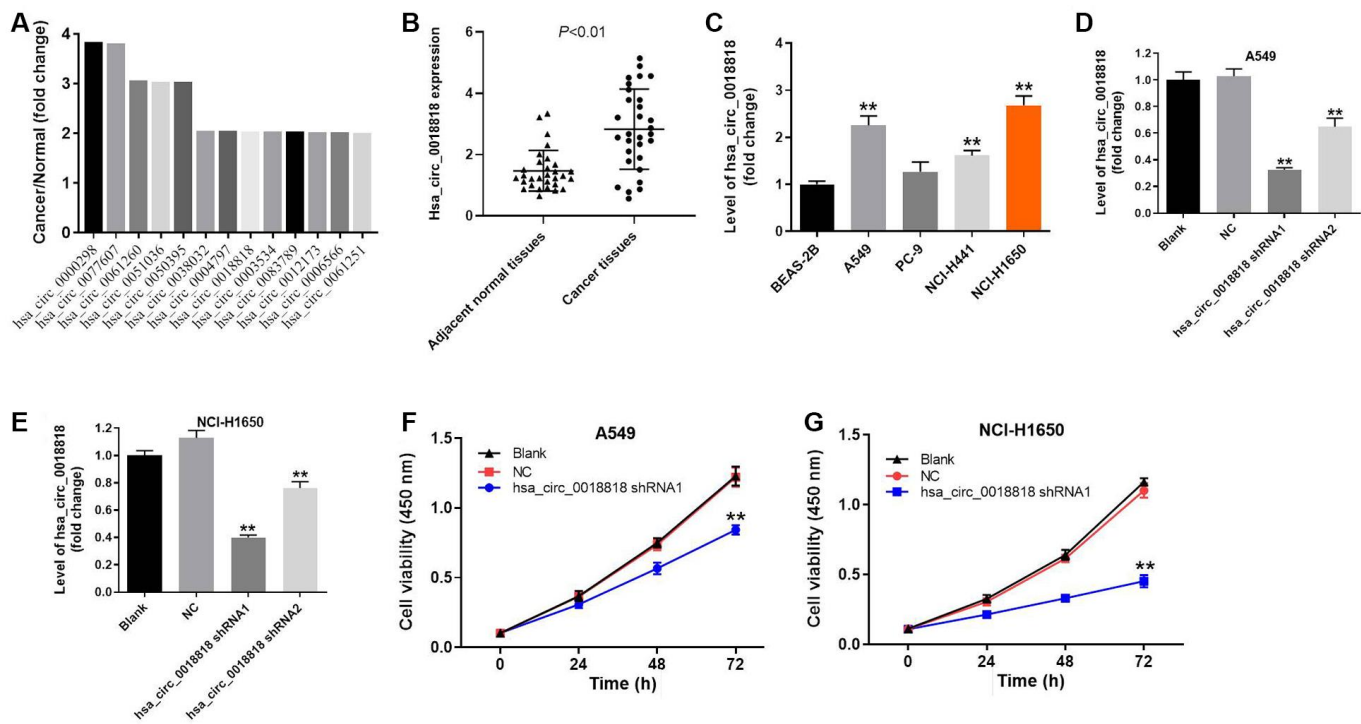

**Figure 3. Downregulation of hsa\_circ\_0018818 inhibits NSCLC cells proliferation.** (A) The overlap of these differentially expressed circRNAs was analyzed. (B) RT-qPCR analysis of hsa\_circ\_0018818 gene expression in NSCLC and adjacent normal tissues. (C) RT-qPCR analysis of hsa\_circ\_0018818 gene expression in BEAS-2B, A549, PC-9, NCI-H1441 and NCI-H1650 cells. (D, E) Suppression of hsa\_circ\_0018818 expression after transfection of A549 and NCI-H1650 cells with shRNA for 24 h. (F, G) CCK-8 assays of A549 and NCI-H1650 cell proliferation. Shown are the OD<sub>450</sub> values. \*\* $P < 0.01$  vs. control.

**Table 1. The correlation of hsa\_circ\_0018818 and clinic-pathological parameters of patients with NSCLC.**

| Parameters            | No. of patients | Mean ± SD     | p value |
|-----------------------|-----------------|---------------|---------|
| Age                   |                 |               | 0.619   |
| ≤ 50                  | 18              | 2.711 ± 1.208 |         |
| > 50                  | 12              | 2.061 ± 0.828 |         |
| Smoking               |                 |               | 0.656   |
| Yes                   | 17              | 2.608 ± 1.070 |         |
| No                    | 13              | 2.133 ± 0.928 |         |
| Tumor volume          |                 |               | 0.571   |
| ≤ 3 cm                | 13              | 2.501 ± 1.109 |         |
| > 3 cm                | 17              | 2.266 ± 0.899 |         |
| Lymph node metastasis |                 |               | 0.008** |
| N0-N1                 | 18              | 3.768 ± 1.322 |         |
| N2-N3                 | 12              | 1.461 ± 0.887 |         |
| Distant metastasis    |                 |               | 0.058*  |
| M0                    | 17              | 3.432 ± 1.322 |         |
| M1                    | 13              | 1.885 ± 0.821 |         |
| TNM stage             |                 |               | 0.389   |
| I-II                  | 15              | 2.934 ± 1.181 |         |
| III-IV                | 15              | 2.115 ± 0.923 |         |

\*P<0.05, \*\*P<0.01, student's t test.

TNM: Tumor Node Metastasis.

According to Union for International Cancer Control, version 8.

*in vivo*. Four weeks after subcutaneous injection of NC1-H1650 cells, tumor size and weight were significantly lower when cells were transfected hsa\_circ\_0018818 shRNA1 prior to injection (Figure 8A, 8B). RT-qPCR confirmed that hsa\_circ\_0018818 levels were stably suppressed within the tumor tissue (Figure 8C). In

addition, western blotting revealed that expression levels of NID1, p-Akt and p-ERK were all significantly reduced in tumor tissues expressing hsa\_circ\_0018818 shRNA1 (Figure 8D–8G). These results demonstrate that downregulating hsa\_circ\_0018818 significantly attenuates NSCLC tumorigenesis *in vivo*.

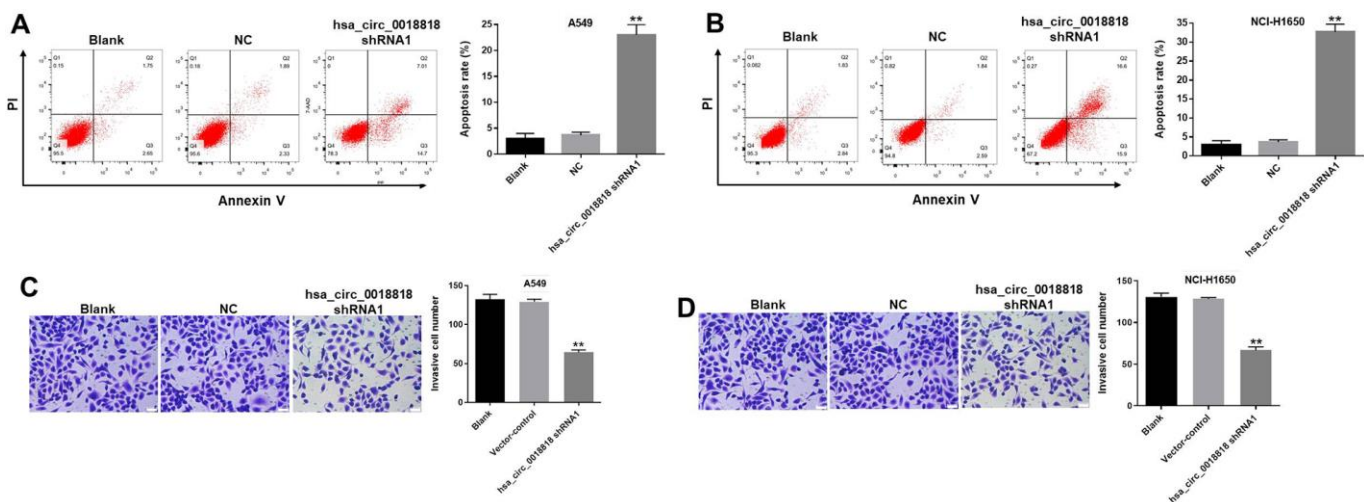

**Figure 4. Hsa\_circ\_0018818 shRNA1 induces apoptosis and inhibits invasion by NSCLC cells. (A, B)** The incidence of apoptosis was detected using FACS after double staining cells with Annexin V and PI. X axis: the level of Annexin-V FITC fluorescence; Y axis: the PI fluorescence. **(C, D)** Transwell assays testing the invasiveness of A549 and NCI-H1650 cells. Magnification: 400×. \*\*P< 0.01 compared to control.

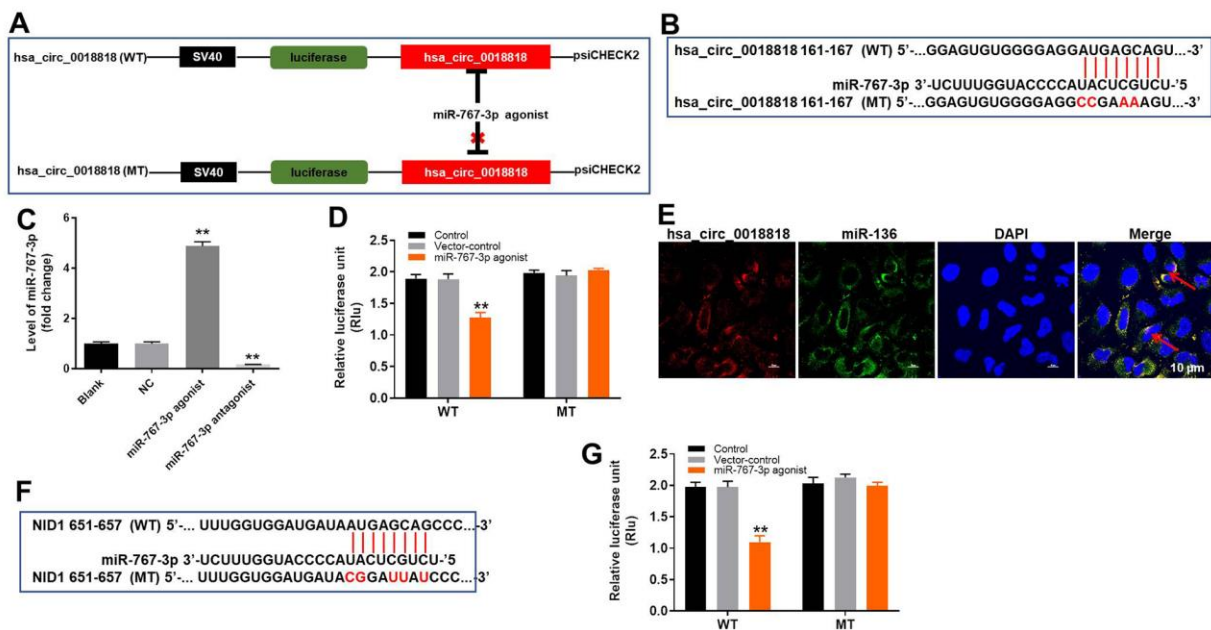

**Figure 5. MiR-767-3p is the downstream target of hsa\_circ\_0018818.** (A, B) Gene structure of hsa\_circ\_0018818 indicating the predicted miR-767-3p binding site in its 3'UTR. (C) RT-qPCR analysis miR-767-3p expression in NCI-H1650 cells. (D) The luciferase activity in NCI-H1650 cells after co-transfecting a plasmid encoding the wild-type (WT) or mutant (MT) hsa\_circ\_0018818 3'-UTR and miR-767-3p. (E) Co-localization of hsa\_circ\_0018818 and miR-767-3p detected using FISH. \*\* $P < 0.01$  vs. control. (F) Gene structure of NID1 at the position of bp 161-167 showing the predicted miR-767-3p binding site in its 3'UTR. (G) Luciferase activity in NCI-H1650 cells after co-transfecting a plasmid encoding the WT or MT NID1 3'-UTR and miR-767-3p. \*\* $P < 0.01$  vs. control.

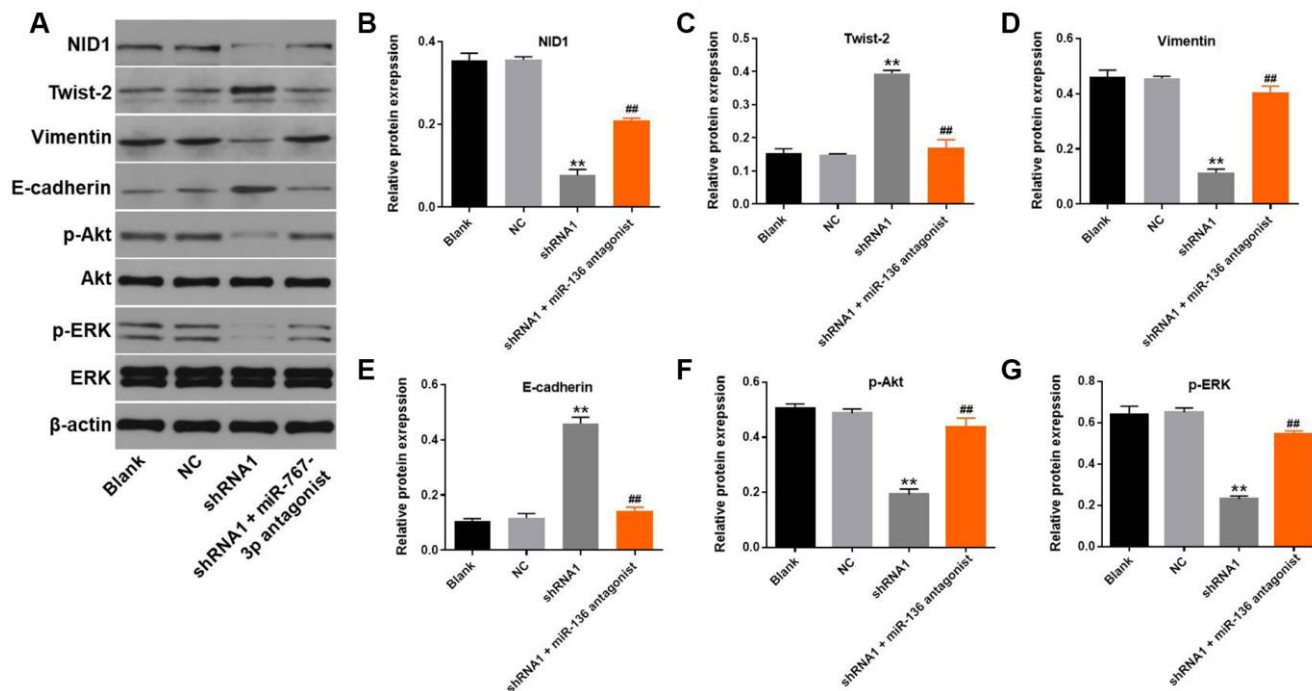

**Figure 6. Silencing Hsa\_circ\_0018818 inhibits NSCLC progression by inactivating EMT process and PI3K/Akt signaling.** (A) Western blot analysis of NID1, E-cadherin, Vimentin, Twist-2, Akt, ERK, p-Akt and p-ERK expression in NCI-H1650 cells. (B–G) Relative levels of NID1, Vimentin, E-cadherin, Twist-2, p-Akt and p-ERK expression in NCI-H1650 cells normalized to  $\beta$ -actin expression. \*\* $P < 0.01$  vs. control. ## $P < 0.01$  vs. shRNA1.

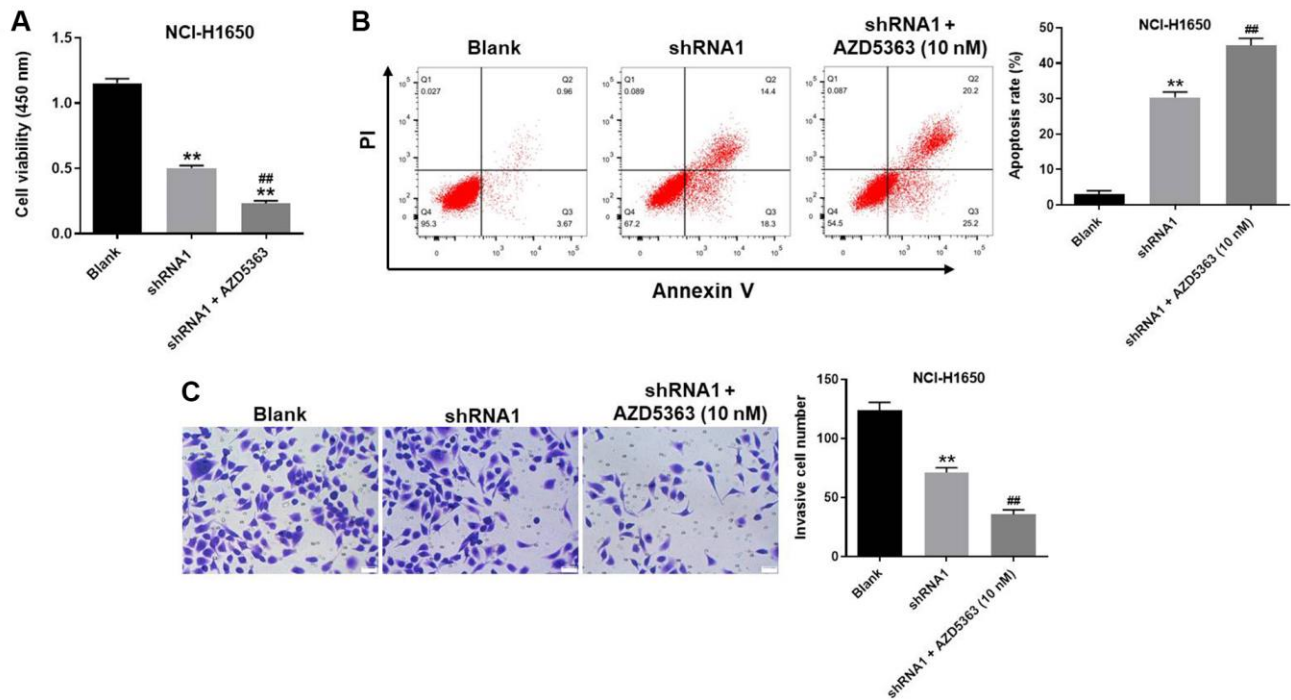

**Figure 7. Akt inhibitor further enhanced the inhibitory effect of hsa\_circ\_0018818 shRNA on progression of NSCLC.** (A) The OD value of NCI-H1650 cells was detected by CCK-8 assay. (B) The apoptotic NSCLC cells were examined by flow cytometry. (C) The invasion of NSCLC cells was tested by transwell assay. \*\* $P < 0.01$  vs. control. ## $P < 0.01$  vs. shRNA1.

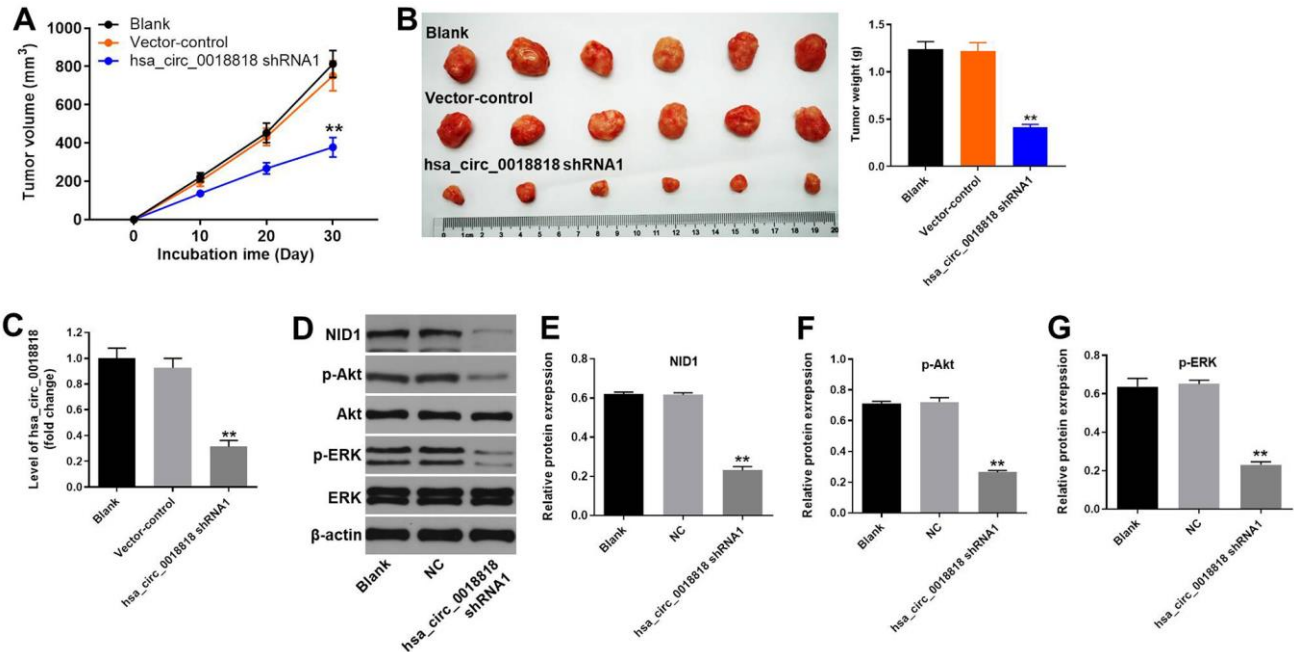

**Figure 8. Hsa\_circ\_0018818 shRNA1 suppresses NSCLC tumor growth *in vivo*.** Mice were subcutaneously injected NCI-H1650 transfected with vector-control or hsa\_circ\_0018818 shRNA1 or left untreated (Blank), after which tumors were allowed to grow for 4 weeks. (A) Volumes of tumors collected at the indicated times after transplantation. (B) Images of tumors (left) and tumor weights (right) after 4 weeks. (C) RT-qPCR analysis of hsa\_circ\_0018818 gene expression in tumor tissues. (D) Western blot analysis of NID1, Akt, ERK, p-Akt and p-ERK levels in tumor tissues. (E–G) Relative levels of NID1, p-Akt and p-ERK expression normalized to β-actin expression. \*\* $P < 0.01$  vs. control.

## DISCUSSION

CircRNAs, which are species of noncoding RNAs widely distributed in humans [12], different from linear noncoding RNAs such as miRNAs. It has been reported that circRNAs may mediate upregulation or downregulation of gene expression and, despite being classified as noncoding, may also encode proteins [13]. Moreover, circRNAs are stable and widely expressed in many tumor tissues [14, 15]. Some circRNAs have important biological functions and can be considered as biomarkers for diagnosis of multiple diseases [4, 16, 17]. This suggests the possibility that circRNAs, like miRNAs, may be involved in paracrine signaling or cell-to-cell crosstalk. Our findings indicate that hsa\_circ\_0018818 downregulation suppresses NSCLC cell proliferation and induces apoptosis, which is consistent with earlier reports indicating that circRNAs regulate the progression of NSCLC [9, 18, 19]. These findings suggest that hsa\_circ\_0018818 likely acts to promote tumorigenesis of NSCLC, particularly during the early stages of the disease. This may make hsa\_circ\_0018818 an important biomarker for diagnosis of early stage NSCLC.

MiRNAs are known to play important roles in the progression of multiple diseases, including NSCLC [20, 21]. We found that a miR-767-3p antagonist partially reversed the inhibitory effect of hsa\_circ\_0018818 knockdown on expression of NID1, p-Akt and p-ERK. Wan et al reported that miR-767-3p induces downregulation of lung adenocarcinoma cell proliferation and induce apoptosis [22]. Our findings suggest miR-767-3p is also a key regulator of NSCLC progression. In addition, Jiang et al demonstrated that hsa\_circ\_0000673 enhances hepatocellular carcinoma malignancy by sponging miR-767-3p [23]. These results are similar to our present findings, indicating that hsa\_circ\_0018818 knockdown suppresses the tumorigenesis of NSCLC by sponging miR-767-3p.

It was previously reported that NID1 plays a key role in multiple malignant tumors [24, 25]. For example, NID1 reportedly regulates such functions as cell proliferation, survival and metastasis [26, 27]. Our findings indicate that NID1 is a direct target of miR-767-3p. It was previously reported that miR-192 suppresses the progression of Hirschsprung's disease by directly targeting NID1 [28], and that NID1 acts as a tumor promoter in NSCLC [27]. These results further implicate NID1 in the development of NSCLC; indeed, they suggest NID1 may act as a key promoter in the occurrence of NSCLC. Otherwise, Jiang W et al indicated SET is the direct target of miR-767-3p in hepatocellular carcinoma [23]. This difference may due to the different tumor type.

Components of the PI3K/Akt pathway are targeted in more types of cancer than any other growth factor signaling pathway, and it is commonly activated as a cancer promoter [29]. It appears that the PI3K/Akt pathway is composed of multiple bifurcating and converging kinase cascades, supplying numerous potential targets for tumor therapy [30, 31]. In our current research, hsa\_circ\_0018818 knockdown significantly inactivated PI3K/Akt signaling. An earlier report similarly found that inactivation of PI3K/Akt signaling contributes to NSCLC cell apoptosis [32]. Moreover, our findings suggested that knockdown of hsa\_circ\_0018818 inactivated EMT in NSCLC cells. Ya Zhou et al revealed that NID1 could activate NID1/PI3K/Akt/EMT to regulate the tumorigenesis of ovarian cancer [33]. Together with that report, our results suggest NID1 promotes EMT process in NSCLC through activation of PI3K/Akt. Frankly speaking, this study only focused on the effect of hsa\_circ\_0018818 on PI3K/Akt signaling so far. Given that ASK1/JNK signaling reportedly acts as a tumor suppressor during the pathogenesis of NSCLC [34], we will investigate the effect of hsa\_circ\_0018818 on ASK1/JNK signaling in a future study.

In summary, we found that hsa\_circ\_0018818 was upregulated in NSCLC. Moreover, knockdown of hsa\_circ\_0018818 could inhibit NSCLC tumorigenesis by mediating miR-767-3p sponging and NID1/PI3K/Akt/EMT axis, making it a potential biomarker for the prognosis and treatment of NSCLC.

## MATERIALS AND METHODS

### Cell culture

The BEAS-2B, A549, PC-9, NCI-H441, NCI-H1650 and 293T cell lines were obtained from the American Type Culture Collection (ATCC, Manassas, VA, USA) and cultured in Dulbecco's Modified Eagle's Medium (DMEM, Thermo Fisher Scientific, Waltham, MA, USA) supplemented with 10% FBS (Thermo Fisher Scientific), 1% penicillin and streptomycin (Thermo Fisher Scientific) at 37°C under a 5% CO<sub>2</sub> atmosphere. AZD5363 (Akt inhibitor) was obtained from MedChemExpress (MCE, Monmouth Junction, NJ, USA).

### Bioinformatics analysis

Three datasets (GSE101586, GSE101684 and GSE112214) containing the gene expression data for NSCLC and adjacent normal tissue (controls) were obtained from the GEO database (<https://www.ncbi.nlm.nih.gov/geo/>). Among them, GSE101684 was a dataset from a patient with early stage of NSCLC. Gene Ontology (GO) analysis was performed to explore the



functional roles of circRNA-targeted genes in terms of biological processes, cellular components, and molecular functions. Biological pathways were defined using the Kyoto Encyclopedia of Genes and Genomes (KEGG).

### Tissue collection

In total, 30 pairs of NSCLC samples and adjacent normal tissues were collected from Peking Union Medical College Hospital between June 2018 and June 2019. The clinical and pathological data of these patients were collected with their written informed consent. Each tissue sample was stored at -80°C until RNA extraction. The present study was approved by the Ethics Committee of Peking Union Medical College Hospital. The correlation of hsa\_circ\_0018818 and clinic-pathological parameters of patients with NSCLC was presented in Table 1.

### Quantitative real time polymerase chain reaction (RT-qPCR)

Total RNA was extracted from NSCLC cell lines or tissues using TRIzol reagent (TaKaRa, Tokyo, Japan) according to the manufacturer's protocol. cDNA was synthesized using a reverse transcription kit (TaKaRa, Ver.3.0) according to the manufacturer's protocol. Real-Time qPCRs were performed in triplicate using the following protocol: 2 min at 94°C, followed by 35 cycles of 30 s at 94°C and 45 s at 55°C. The primers for hsa\_circ\_0018818, miR-767-3p,  $\beta$ -actin and U6 were obtained from GenePharma (Shanghai, China): for Hsa\_circ\_0018818, 5'-CCCACAGTTTTGCTCTGCAAG-3' (forward) and 5'-AGGTGTAGCCTGAGAAGTACGC-3' (reverse); for MiR-767-3p, 5'-TCCA TTTGTTTTGATGATGGACT-3' (forward) and 5'-CTCAACTGGTGTCTGGAGTC-3' (reverse); for  $\beta$ -actin, 5'-GTCCACCGCAAATGCTTCTA-3' (forward) and 5'-TGCTGTACCTTCACCGTTC-3' (reverse); and for U6, 5'-CTCGCTTCGGCAGCACAT-3' (forward) and 5'-AACGCTTCACGAATTTGCGT-3' (reverse). The relative fold changes were calculated using the  $2^{-\Delta\Delta Ct}$  method with the formula  $2^{-(\text{sample } \Delta Ct - \text{control } \Delta Ct)}$ , where  $\Delta Ct$  is the difference between the amplification fluorescent thresholds of the gene of interest and the internal reference gene (U6 or  $\beta$ -actin) used for normalization.

### Cell transfection

PcDNA3.1 expression vector encoding short-hairpin RNA (shRNA1 or shRNA2) targeting hsa\_circ\_0018818 or a non-targeted sequence (negative control) were obtained from GenScript Co., Ltd (Nanjing,

China). NSCLC cells were then transfected with the vector using Liposome 2000, after which the transfectants were selected by incubation in the presence of G418 (Sigma Aldrich, St. Louis, MO, USA). RT-qPCR was used to verify the transfection efficiency. The shRNA sequences were as follows: hsa\_circ\_0018818 shRNA1, 5'-CTTCCCACAGTTTT GCTCTG-3' (forward) and AAAACTTCCCACAGT TTTG (reverse); hsa\_circ\_0018818 shRNA2, 5'-CAG TTTTGCTCTGCAGACGG-3' (forward) and AAAAA CAGTTTTGCTCTGCA (reverse).

In addition, NCI-H1650 cells were transfected with miR-767-3p agonist, miR-767-3p antagonist or negative control (NC) RNAs (GenePharma, Shanghai, China) using Lipofectamine 2000 as previously described [35]. The transfection efficiency was determined using q-PCR.

### CCK-8 assays

A549 or NCI-H1650 cells were seeded into 96-well plates ( $5 \times 10^3$  per well) and incubated overnight at 37°C. The cells were then treated with NC, hsa\_circ\_0018818 shRNA1 or hsa\_circ\_0018818 shRNA1 + AZD5363 (Akt inhibitor) for 0, 24, 48 or 72 h, after which 10  $\mu$ l of CCK-8 reagent were added to each well, and the cells were incubated for an additional 2 h. Finally, the absorbance at 450 nm was measured using a microplate reader (Thermo Fisher Scientific).

### Cell apoptosis analysis

A549 or NCI-H1650 cells were trypsinized, washed with phosphate-buffered saline, resuspended in Annexin V Binding Buffer, and stained with 5  $\mu$ l of FITC and 5  $\mu$ l of propidium (PI) for 15 min. The cells were analyzed using a flow cytometer (BD, Franklin Lake, NJ, USA) to assess the incidence of cell apoptosis.

### Transwell assays

The invasiveness of the cells was assessed using transwell assays. The upper chamber is pre-treated with 100  $\mu$ l of Matrigel, after which A549 or NCI-H1650 cells were seeded into the upper chamber in RPMI1640 medium with 1% FBS. The density was adjusted to about  $1.0 \times 10^6$  cells per chamber. RPMI1640 medium with 10% FBS was added in the lower chamber. After incubation for 48 h at 37°C, the non-invading cells in the upper chamber were removed with a cotton swab. Cells in the lower chamber were stained with 0.1% crystal violet and counted under a microscope (LEICADMLB2, Frankfurt, Germany).

## Dual luciferase reporter assay

The partial sequences of hsa\_circ\_0018818 and the NID1 3'-UTR containing putative miR-767-3p binding sites were obtained from Sangon Biotech (Shanghai, China) and cloned into pmirGLO Dual-Luciferase miRNA Target Expression Vectors (Promega, Madison, WI, USA) to construct wild-type reporter vectors hsa\_circ\_0018818 (WT) and NID1 (WT), respectively. Mutant hsa\_circ\_0018818 and NID1 3'-UTR sequences containing the putative miR-767-3p binding site were generated using a Q5 Site-Directed Mutagenesis Kit (New England Biolabs, Ipswich, MA, USA) and then cloned into pmirGLO vectors to generate the mutant-type reporter vectors hsa\_circ\_0018818 (MUT) and NID1 (MUT). hsa\_circ\_0018818 (WT) or hsa\_circ\_0018818 (MUT) were transfected into 293T cells together with NC or miR-767-3p agonist using Lipofectamine 2000 (Thermo Fisher Scientific). Similarly, NID1 (WT) or NID1 (MUT) was transfected into 293T cells together with NC or miR-767-3p agonist. Relative luciferase activities were then analyzed using a Dual-Glo Luciferase Assay System (Promega).

## Fluorescence in situ hybridization (FISH)

To explore the relation between hsa\_circ\_0018818 and miR-767-3p, their colocalization in the cytoplasm was investigated using FISH as previously described [36].

## Western blotting

Total protein was isolated from cell lysates or tumor tissues using RIPA buffer, and quantified using a BCA protein assay kit (Beyotime, Shanghai, China). Proteins were resolved on 10% SDS-PAGE and then transferred to PVDF (Bio-Rad) membranes. After blocking, the membranes were incubated first with primary antibodies at 4°C overnight and then with secondary anti-rabbit antibody (Abcam; 1:5000) at room temperature for 1 h. Membranes were scanned using an Odyssey Imaging System and analyzed using Odyssey v2.0 software (LICOR Biosciences, Lincoln, NE, USA). The primary antibodies were anti-Akt (Abcam, Cambridge, MA, USA; 1:1000), anti-ERK (Abcam; 1:1000), anti-NID1 (Abcam; 1:1000), anti-E-cadherin (Abcam; 1:1000), anti-Twist2 (Abcam; 1:1000), anti-Vimentin (Abcam; 1:1000) and anti- $\beta$ -actin (Abcam; 1:1000).  $\beta$ -actin served as an internal control.

## In vivo study

Eighteen BALB/c nude mice (6-8 weeks old) were purchased from Vital River (Beijing, China) and housed within a dedicated SPF facility. NCI-H1650 cells stably expressing hsa\_circ\_0018818 shRNA1 were

transplanted subcutaneously into each mouse as described previously [37]. Tumor volume was then measured weekly as described previously [38]. At the end of the experiment, the mice were sacrificed and the tumors were collected and weighted. All *in vivo* experiments were performed in accordance with National Institutes of Health Guide for the Care and Use of Laboratory Animals. The protocol was approved by the Ethics Committees of Peking Union Medical College Hospital.

## Statistical analysis

All data were expressed as the mean  $\pm$  standard deviation (SD) of at least three independent experiments. Differences were analyzed using one-way analysis of variance (ANOVA) followed by Tukey's test (more than 2 groups, Graphpad Prism7). Values of  $P < 0.05$  was considered statistically significant.

## CONFLICTS OF INTEREST

These authors declared no conflicts of interests in this research.

## REFERENCES

1. Shima T, Shimoda M, Shigenobu T, Ohtsuka T, Nishimura T, Emoto K, Hayashi Y, Iwasaki T, Abe T, Asamura H, Kanai Y. Infiltration of tumor-associated macrophages is involved in tumor programmed death-ligand 1 expression in early lung adenocarcinoma. *Cancer Sci.* 2020; 111:727–38. <https://doi.org/10.1111/cas.14272> PMID:31821665
2. Blandin Knight S, Crosbie PA, Balata H, Chudziak J, Hussell T, Dive C. Progress and prospects of early detection in lung cancer. *Open Biol.* 2017; 7:7. <https://doi.org/10.1098/rsob.170070> PMID:28878044
3. Jin X, Chen Y, Chen H, Fei S, Chen D, Cai X, Liu L, Lin B, Su H, Zhao L, Su M, Pan H, Shen L, et al. Evaluation of Tumor-Derived Exosomal miRNA as Potential Diagnostic Biomarkers for Early-Stage Non-Small Cell Lung Cancer Using Next-Generation Sequencing. *Clin Cancer Res.* 2017; 23:5311–19. <https://doi.org/10.1158/1078-0432.CCR-17-0577> PMID:28606918
4. Zheng S, Wen C, Yang S, Yang Y, Yang F. Circular RNA expression profiles following MC-LR treatment in human normal liver cell line (HL7702) cells using high-throughput sequencing analysis. *J Toxicol Environ Health A.* 2019; 82:1103–12. <https://doi.org/10.1080/15287394.2019.1698120> PMID:31825292
5. Ju Y, Yuan L, Yang Y, Zhao H. CircSLNN: Identifying RBP-

- Binding Sites on circRNAs *via* Sequence Labeling Neural Networks. *Front Genet.* 2019; 10:1184.  
<https://doi.org/10.3389/fgene.2019.01184>  
PMID:31824574
6. Yao Z, Xu R, Yuan L, Xu M, Zhuang H, Li Y, Zhang Y, Lin N. Circ\_0001955 facilitates hepatocellular carcinoma (HCC) tumorigenesis by sponging miR-516a-5p to release TRAF6 and MAPK11. *Cell Death Dis.* 2019; 10:945.  
<https://doi.org/10.1038/s41419-019-2176-y>  
PMID:31822654
  7. Mance LG, Mawla I, Shell SM, Cahoon AB. Mitochondrial mRNA Fragments are Circularized in a Human HEK Cell Line. *Mitochondrion.* 2020; 51:1–6.  
<https://doi.org/10.1016/j.mito.2019.11.002>  
PMID:31821898
  8. Wu X, Xia T, Cao M, Zhang P, Shi G, Chen L, Zhang J, Yin J, Wu P, Cai B, Lu Z, Miao Y, Jiang K. LncRNA BANCR Promotes Pancreatic Cancer Tumorigenesis via Modulating MiR-195-5p/Wnt/ $\beta$ -Catenin Signaling Pathway. *Technol Cancer Res Treat.* 2019; 18:1533033819887962.  
<https://doi.org/10.1177/1533033819887962>  
PMID:31769353
  9. Zhang PF, Pei X, Li KS, Jin LN, Wang F, Wu J, Zhang XM. Circular RNA circFGFR1 promotes progression and anti-PD-1 resistance by sponging miR-381-3p in non-small cell lung cancer cells. *Mol Cancer.* 2019; 18:179.  
<https://doi.org/10.1186/s12943-019-1111-2>  
PMID:31815619
  10. Bai C, Yang W, Lu Y, Wei W, Li Z, Zhang L. Identification of Circular RNAs Regulating Islet  $\beta$ -Cell Autophagy in Type 2 Diabetes Mellitus. *Biomed Res Int.* 2019; 2019:4128315.  
<https://doi.org/10.1155/2019/4128315>  
PMID:31815137
  11. Pan RY, Zhao CH, Yuan JX, Zhang YJ, Jin JL, Gu MF, Mao ZY, Sun HJ, Jia QW, Ji MY, Zhang J, Wang LS, Ma WZ, et al. Circular RNA profile in coronary artery disease. *Am J Transl Res.* 2019; 11:7115–25.  
PMID:31814914
  12. Su Y, Lv X, Yin W, Zhou L, Hu Y, Zhou A, Qi F. CircRNA Cdr1as functions as a competitive endogenous RNA to promote hepatocellular carcinoma progression. *Aging (Albany NY).* 2019; 11:8182–203.  
<https://doi.org/10.18632/aging.102312>  
PMID:31581132
  13. Xiong DD, Dang YW, Lin P, Wen DY, He RQ, Luo DZ, Feng ZB, Chen G. A circRNA-miRNA-mRNA network identification for exploring underlying pathogenesis and therapy strategy of hepatocellular carcinoma. *J Transl Med.* 2018; 16:220.  
<https://doi.org/10.1186/s12967-018-1593-5>  
PMID:30092792
  14. Hong H, Zhu H, Zhao S, Wang K, Zhang N, Tian Y, Li Y, Wang Y, Lv X, Wei T, Liu Y, Fan S, Liu Y, et al. The novel circCLK3/miR-320a/FoxM1 axis promotes cervical cancer progression. *Cell Death Dis.* 2019; 10:950.  
<https://doi.org/10.1038/s41419-019-2183-z>  
PMID:31831728
  15. Cui W, Dai J, Ma J, Gu H. circCDYL/microRNA-105-5p participates in modulating growth and migration of colon cancer cells. *Gen Physiol Biophys.* 2019; 38:485–95.  
[https://doi.org/10.4149/gpb\\_2019037](https://doi.org/10.4149/gpb_2019037)  
PMID:31829306
  16. Chu H, Wang W, Luo W, Zhang W, Cheng Y, Huang J, Wang J, Dai X, Fang S, Chao J. CircHECTD1 mediates pulmonary fibroblast activation *via* HECTD1. *Ther Adv Chronic Dis.* 2019; 10:2040622319891558.  
<https://doi.org/10.1177/2040622319891558>  
PMID:31832126
  17. Chen Y, Zhao H, Li H, Feng X, Tang H, Qiu C, Zhang J, Fu B. LINC01234/MicroRNA-31-5p/MAGEA3 Axis Mediates the Proliferation and Chemoresistance of Hepatocellular Carcinoma Cells. *Mol Ther Nucleic Acids.* 2020; 19:168–78.  
<https://doi.org/10.1016/j.omtn.2019.10.035>  
PMID:31838274
  18. Gao P, Wang Z, Hu Z, Jiao X, Yao Y. Circular RNA circ\_0074027 indicates a poor prognosis for NSCLC patients and modulates cell proliferation, apoptosis, and invasion via miR-185-3p mediated BRD4/MADD activation. *J Cell Biochem.* 2020; 121:2632–42.  
<https://doi.org/10.1002/jcb.29484>  
PMID:31680319
  19. Yao JT, Zhao SH, Liu QP, Lv MQ, Zhou DX, Liao ZJ, Nan KJ. Over-expression of CircRNA\_100876 in non-small cell lung cancer and its prognostic value. *Pathol Res Pract.* 2017; 213:453–56.  
<https://doi.org/10.1016/j.prp.2017.02.011>  
PMID:28343871
  20. Ge P, Cao L, Chen X, Jing R, Yue W. miR-762 activation confers acquired resistance to gefitinib in non-small cell lung cancer. *BMC Cancer.* 2019; 19:1203.  
<https://doi.org/10.1186/s12885-019-6416-4>  
PMID:31823748
  21. Lu X, Xue B, Zhang T, Zhou X, Zhang Y. Down-regulation of microRNA-10a mediates the anti-tumor effect of icaritin in A549 cells via the PTEN/AKT and ERK pathway. *Gen Physiol Biophys.* 2019; 38:525–33.  
[https://doi.org/10.4149/gpb\\_2019041](https://doi.org/10.4149/gpb_2019041)  
PMID:31829310
  22. Wan YL, Dai HJ, Liu W, Ma HT. miR-767-3p Inhibits Growth and Migration of Lung Adenocarcinoma Cells by Regulating CLDN18. *Oncol Res.* 2018; 26:637–44.

- <https://doi.org/10.3727/096504017X15112639918174>  
PMID:[29169410](https://pubmed.ncbi.nlm.nih.gov/29169410/)
23. Jiang W, Wen D, Gong L, Wang Y, Liu Z, Yin F. Circular RNA hsa\_circ\_0000673 promotes hepatocellular carcinoma malignance by decreasing miR-767-3p targeting SET. *Biochem Biophys Res Commun.* 2018; 500:211–16.  
<https://doi.org/10.1016/j.bbrc.2018.04.041>  
PMID:[29627570](https://pubmed.ncbi.nlm.nih.gov/29627570/)
24. Rokavec M, Bouznad N, Hermeking H. Paracrine Induction of Epithelial-Mesenchymal Transition Between Colorectal Cancer Cells and its Suppression by a p53/miR-192/215/NID1 Axis. *Cell Mol Gastroenterol Hepatol.* 2019; 7:783–802.  
<https://doi.org/10.1016/j.jcmgh.2019.02.003>  
PMID:[30831320](https://pubmed.ncbi.nlm.nih.gov/30831320/)
25. Hsu CW, Chang KP, Huang Y, Liu HP, Hsueh PC, Gu PW, Yen WC, Wu CC. Proteomic Profiling of Paired Interstitial Fluids Reveals Dysregulated Pathways and Salivary NID1 as a Biomarker of Oral Cavity Squamous Cell Carcinoma. *Mol Cell Proteomics.* 2019; 18:1939–49.  
<https://doi.org/10.1074/mcp.RA119.001654>  
PMID:[31315917](https://pubmed.ncbi.nlm.nih.gov/31315917/)
26. Sui X. Inhibition of the NF- $\kappa$ B signaling pathway on endothelial cell function and angiogenesis in mice with acute cerebral infarction. *J Biol Regul Homeost Agents.* 2019; 33:375–84.  
PMID:[30945527](https://pubmed.ncbi.nlm.nih.gov/30945527/)
27. Jin Y, Zhu H, Cai W, Fan X, Wang Y, Niu Y, Song F, Bu Y. B-Myb Is Up-Regulated and Promotes Cell Growth and Motility in Non-Small Cell Lung Cancer. *Int J Mol Sci.* 2017; 18:18.  
<https://doi.org/10.3390/ijms18060860>  
PMID:[28555007](https://pubmed.ncbi.nlm.nih.gov/28555007/)
28. Zhu D, Xie H, Li H, Cai P, Zhu H, Xu C, Chen P, Sharan A, Xia Y, Tang W. Nidogen-1 is a common target of microRNAs MiR-192/215 in the pathogenesis of Hirschsprung's disease. *J Neurochem.* 2015; 134:39–46.  
<https://doi.org/10.1111/jnc.13118>  
PMID:[25857602](https://pubmed.ncbi.nlm.nih.gov/25857602/)
29. Guo H, German P, Bai S, Barnes S, Guo W, Qi X, Lou H, Liang J, Jonasch E, Mills GB, Ding Z. The PI3K/AKT Pathway and Renal Cell Carcinoma. *J Genet Genomics.* 2015; 42:343–53.  
<https://doi.org/10.1016/j.jgg.2015.03.003>  
PMID:[26233890](https://pubmed.ncbi.nlm.nih.gov/26233890/)
30. Szturz P, Vermorken JB. Management of recurrent and metastatic oral cavity cancer: raising the bar a step higher. *Oral Oncol.* 2020; 101:104492.  
<https://doi.org/10.1016/j.oraloncology.2019.104492>  
PMID:[31837576](https://pubmed.ncbi.nlm.nih.gov/31837576/)
31. Pei T, Meng F, Xiao P, Han J, Song R, Lan Y, Wang Y, Xue J, Lang Q, He Z, Li J, Guo Z, Liu G, et al. MUC13 promotes intrahepatic cholangiocarcinoma progression via EGFR/PI3K/AKT pathways. *J Hepatol.* 2020; 72:761–73.  
<https://doi.org/10.1016/j.jhep.2019.11.021>  
PMID:[31837357](https://pubmed.ncbi.nlm.nih.gov/31837357/)
32. Nie H, Xie X, Zhang D, Zhou Y, Li B, Li F, Li F, Cheng Y, Mei H, Meng H, Jia L. Use of lung-specific exosomes for miRNA-126 delivery in non-small cell lung cancer. *Nanoscale.* 2020; 12:877–87.  
<https://doi.org/10.1039/c9nr09011h>  
PMID:[31833519](https://pubmed.ncbi.nlm.nih.gov/31833519/)
33. Zhou Y, Zhu Y, Fan X, Zhang C, Wang Y, Zhang L, Zhang H, Wen T, Zhang K, Huo X, Jiang X, Bu Y, Zhang Y. NID1, a new regulator of EMT required for metastasis and chemoresistance of ovarian cancer cells. *Oncotarget.* 2017; 8:33110–21.  
<https://doi.org/10.18632/oncotarget.16145>  
PMID:[28416770](https://pubmed.ncbi.nlm.nih.gov/28416770/)
34. Han J, Lv W, Sheng H, Wang Y, Cao L, Huang S, Zhu L, Hu J. Ecliptasaponin A induces apoptosis through the activation of ASK1/JNK pathway and autophagy in human lung cancer cells. *Ann Transl Med.* 2019; 7:539.  
<https://doi.org/10.21037/atm.2019.10.07>  
PMID:[31807521](https://pubmed.ncbi.nlm.nih.gov/31807521/)
35. Yang P, Gao R, Zhou W, Han A. Protective impacts of circular RNA VMA21 on lipopolysaccharide-engendered WI-38 cells injury via mediating microRNA-142-3p. *Biofactors.* 2019. [Epub ahead of print].  
<https://doi.org/10.1002/biof.1593>  
PMID:[31793712](https://pubmed.ncbi.nlm.nih.gov/31793712/)
36. Ren J, Ding L, Zhang D, Shi G, Xu Q, Shen S, Wang Y, Wang T, Hou Y. Carcinoma-associated fibroblasts promote the stemness and chemoresistance of colorectal cancer by transferring exosomal lncRNA H19. *Theranostics.* 2018; 8:3932–48.  
<https://doi.org/10.7150/thno.25541>  
PMID:[30083271](https://pubmed.ncbi.nlm.nih.gov/30083271/)
37. Tong L, Shen S, Huang Q, Fu J, Wang T, Pan L, Zhang P, Chen G, Huang T, Li K, Liu Q, Xie S, Yang X, et al. Proteasome-dependent degradation of Smad7 is critical for lung cancer metastasis. *Cell Death Differ.* 2019. [Epub ahead of print].  
<https://doi.org/10.1038/s41418-019-0459-6>  
PMID:[31767934](https://pubmed.ncbi.nlm.nih.gov/31767934/)
38. Liu JQ, Feng YH, Zeng S, Zhong MZ. linc01088 promotes cell proliferation by scaffolding EZH2 and repressing p21 in human non-small cell lung cancer. *Life Sci.* 2020; 241:117134.  
<https://doi.org/10.1016/j.lfs.2019.117134>  
PMID:[31811854](https://pubmed.ncbi.nlm.nih.gov/31811854/)
